# Supplementary material for: Establishing a panel of chemo-resistant mesothelioma models for investigating chemo-resistance and identifying new treatments for mesothelioma
Source: PubMed Central journal article supplement — Sci Rep. 2014 Aug 21;4:6152. doi: 10.1038/srep06152 (PMC4139953; doi:10.1038/srep06152), 2014-08-21

Manuscript title: Establishing a panel of chemo-resistant mesothelioma models for investigating chemo-resistance and identifying new treatments for mesothelioma.

Amanda L. Hudson, Chris Weir, Elizabeth Moon, Rozelle Harvie, Sonja Klebe, Stephen J. Clarke, Nick Pavlakis and Viive M. Howell.

Supplementary information (SI) table 1: Genes found on the SABiosciences Drug resistance and metabolism PCR array arranged in functional groups.

| <b>Functional gene group</b>   | <b>Gene abbreviations</b>                                                                                                                                                                    |
|--------------------------------|----------------------------------------------------------------------------------------------------------------------------------------------------------------------------------------------|
| <b>Drug Resistance</b>         | <i>Abcb1 (Mdr-1), Abcb1b, Abcb4, Abcc1 (Mrp1), Abcc2 (Mrp2), Abcc3 (Mlp-2), Abcc5 (Mrp5), Abcc6 (Mrp6), Abcg2 (Bcrp), Bax, Bcl2, Bcl2l1 (Bcl-x), Mvp, Rb1, Top1, Top2a, Top2b, Tp53.</i>     |
| <b>Drug Metabolism</b>         | <i>Arnt, Blmh, Crabp1, Cyp1a1, Cyp1a2, Cyp2b2, Cyp2c, Cyp2c13, Cyp2c22, Cyp2c37, Cyp2c7, Cyp2c79, Cyp2d4v1, Cyp2e1, Cyp3a2, Dhfr, Ephx1, Gstm1 (Mgst1), Nat2, Sult1e1 (Ste), Sod1, Ugcg.</i> |
| <b>DNA repair</b>              | <i>Apc, Atm, Brca1, Brca2, Ercc3 (Xpb), Xpa, Xpc.</i>                                                                                                                                        |
| <b>Cell Cycle</b>              | <i>Ccnd1, Ccne1, Cdk2, Cdk4, Cdkn1a (p21Waf1), Cdkn1b (p27Kip1), Cdkn2a (p16Ink4a), Cdkn2d (p19ink4d).</i>                                                                                   |
| <b>Growth Factor Receptors</b> | <i>Egfr, Erbb2 (Neu, Her2), Erbb3, Erbb4, Fgf2 (bFGF), Met</i>                                                                                                                               |
| <b>Hormone Receptors</b>       | <i>Ar, Esr1 (ERA), Esr2 (ER<math>\beta</math>-cx), Igf2r, Ppara, Ppard, Pparg, Rara, Rarb, Rxra, Rxrb</i>                                                                                    |
| <b>Transcription Factors</b>   | <i>Ahr, Ap1s1, Elk1, Fos, Gabpa, Hif1a, Mafk, Myc, Nfkb1, Nfkb2, Nfkbib (Trip9), Nfkbie</i>                                                                                                  |

SI table 2: Primary antibodies for immunohistochemical analysis.

| Antibody                                                | Description                                                                                                                          | Source                     | Dilution | Identifying Cellular Localization |
|---------------------------------------------------------|--------------------------------------------------------------------------------------------------------------------------------------|----------------------------|----------|-----------------------------------|
| WT1, clone 6F-H2                                        | Expressed in normal mesothelium and regarded as a useful marker of malignant mesothelioma <sup>1,2</sup>                             | Dako                       | 1:100    | Nucleus                           |
| Calretinin, rabbit polyclonal                           | Expressed in normal mesothelial cells and considered key identifier of malignant mesothelioma, especially epithelioid <sup>3,5</sup> | Zymed (Life Technologies)  | 1:100    | Must be nucleus                   |
| Podoplanin, hybridoma supernatant                       | Useful marker especially for sarcomatoid mesothelioma <sup>6-8</sup>                                                                 | Angiobio                   | 1:50     | Membrane and cytoplasm            |
| <b>NB: clone D2-40 did not recognize rat tissue</b>     |                                                                                                                                      |                            |          |                                   |
| Mesothelial Cell, clone HBME-1                          | Found in normal mesothelium and used as a marker of malignant mesothelioma <sup>4,9</sup>                                            | Dako                       | 1:500    | Membrane                          |
| Cytokeratin 5/6, clone D5/16B4                          | Considered a useful marker of malignant mesothelioma, especially the epithelioid subtype <sup>5, 10, 11</sup>                        | Chemicon (Merck Millipore) | 1:100    | Cytoplasm                         |
| Cytokeratin, clone MNF116                               | Considered useful marker of malignant mesothelioma <sup>6, 12</sup>                                                                  | Dako                       | 1:50     | Cytoplasm                         |
| E-Cadherin, clone 36                                    | Decreased expression indicative of epithelial to mesenchymal transition <sup>13</sup>                                                | BD transduction systems    | 1:1000   | Membrane                          |
| Vimentin, clone EPR3776                                 | Increased expression indicative of epithelial to mesenchymal transition <sup>13</sup>                                                | Epitomics                  | 1:200    | Cytoplasm                         |
| Ki67, clone SP6                                         | Expressed in proliferating cells <sup>14</sup>                                                                                       | Thermo Scientific          | 1:100    | Nucleus                           |
| CD15, clone C3D-1                                       | Negative marker of MM (carcinoma-related) <sup>7, 15</sup>                                                                           | Santa Cruz                 | 1:100    | Membrane                          |
| TTF-1, clone 8G7G3/1                                    | Negative marker of MM (carcinoma-related) <sup>11</sup>                                                                              | Dako                       | 1:100    | Nucleus                           |
| CEA, clone II-7 ( <i>did not recognize rat tissue</i> ) | Negative marker of MM (carcinoma-related) <sup>3, 5</sup>                                                                            | Dako                       | 1:50     | Cytoplasm                         |

SI table 3: Antibody panel for rat leukocyte cell detection.

| <b>Antibody</b>                          | <b>Leukocyte detected</b> | <b>Source</b> |
|------------------------------------------|---------------------------|---------------|
| <b>Anti-rat CD4-FITC</b>                 | CD4+ T cells              | Biologend     |
| <b>Anti-rat CD8a-PE</b>                  | CD8+ T cells              | Biologend     |
| <b>Anti-rat CD45-PE/Cy7</b>              | All leukocytes            | Biologend     |
| <b>Anti-rat CD3-APC<sup>1</sup></b>      | T cells                   | BD            |
| <b>Anti-rat CD45 RA-FITC<sup>1</sup></b> | B cells                   | BD            |
| <b>Anti-CD161a-PE<sup>1</sup></b>        | Natural Killer cells      | BD            |

<sup>1</sup>Components of the BD Rat T/B/NK Cocktail.

### **Figure S1: Gene expression in parental and chemo-resistant mesothelioma cells.**

Fold change in excision repair cross complementation group 1 (*Ercc1*), ribonucleotide reductase M1 (*Rrm1*) and thymidylate synthetase (*Tyms*) gene expression was calculated using the  $2^{-\Delta\Delta Ct}$  method after normalizing to a panel of housekeeping genes (*Rplp1*, *Actb* and *Gapdh*). Bars show the means and standard error in gene expression relative to parental II-45 cells from at least three independent experiments. P-values were calculated from at least three independent experiments using a one-way Anova test with a value of less than 0.05 indicating significance. Parental mesothelioma cells, II-45; cisplatin resistant II-45 cells, CisR; pemetrexed resistant II-45 cells, PemR; combination (cisplatin + pemetrexed) resistant II-45 cells, ComboR; gemcitabine resistant II-45 cells, GemR and vinorelbine resistant II-45 cells, VLBR.

### **Figure S2: Glutathione and its contribution to chemo-resistance.**

Cell viability of parental (II-45), cisplatin resistant (CisR) and combination resistant (ComboR) cells following cisplatin treatment in absence or presence (+ BSO) of buthionine sulfoximine was determined using MTT assays. The drug dose causing 50% growth inhibition ( $IC_{50}$  drug dose) was determined and the results are expressed as a percentage of the parental cells. The p-value was calculated by comparing the  $IC_{50}$  values from at least three independent experiments using a one-way Anova test with a value of less than 0.05 indicating significance.

### **Figure S3: CGH schematic for rat Chromosome 5.**

Genomic alterations for chromosome 5 are depicted. Figure generated using Agilent Genomic Workbench v7 program. A homozygous deletion of approximately 4 megabases covering the *Cdkn2a/2b* and *Mtap* gene loci was identified in both the parental (replicates presented by blue lines) and combination resistant (replicates presented by orange lines) II-45 cell lines.

### **Figure S4: Chemo-resistance is maintained *in vivo***

Rats were injected with  $1 \times 10^6$  parental (II-45) or cisplatin resistant (CisR) II-45 cells subcutaneously into the flank ( $n = 2$  per group). Cisplatin was given intraperitoneally on days 3, 14, 21 and 36 at a dose of 2 mg/kg. Rats were euthanised at ethically approved endpoints and survival was plotted using a log-rank (Mantel-Cox) Gehan-Breslow-Wilcoxon graph (a). *Ex vivo* transplants were taken and cell viability was assessed using MTT assays (b). *Points* show the mean and standard error of triplicate wells with the different lines indicating individual rats. The drug dose causing 50% growth inhibition ( $IC_{50}$  drug dose; c) was determined and the p-value was calculated by comparing the  $IC_{50}$  values from at least three independent experiments using a student's t-test test with a value of less than 0.05 indicating significance. \*\*\*  $p < 0.001$ .

### **Figure S5: Representative images of positive immunohistochemical labelling of pleural mesothelioma.**

Tumors derived from parental II-45 cells. (a) Nuclear positivity for Wilms Tumor 1 protein (WT-1) demonstrating extensive labelling with approximately 90% of tumor cells displaying prominent nuclear labelling; (b) Very sparse focal nuclear labelling with only the occasional

positive cell and limited cytoplasmic immunolabelling was observed for calretinin; (c) HBME-1 labelling showing membranous cell localization around the periphery of the tumor; (d) Cytoplasmic immunolabeling for cytokeratin MNF116 was observed at the periphery of the tumors with occasional positive cells in the near vicinity (a similar pattern was seen with immunolabeling for cytokeratin 5/6); (e) Distinct membranous immunolabeling for E-cadherin; (f) Vimentin immunolabeling showing diffuse cytoplasmic staining; (g) Granular nuclear positivity for Ki67. Insert: 2x higher magnification; Scale bar = 50  $\mu$ m.

**Figure S6: Cytokine biomarkers in endpoint plasma samples.**

Rats were injected with 100  $\mu$ L serum free media or serum free media containing  $5 \times 10^5$  parental or chemo-resistant II-45 cells directly into the pleural cavity. At ethical endpoint, rats were euthanized and plasma samples were analysed for cytokine levels relative to rats with parental II-45 mesothelioma. (a) IL-1 $\beta$ ; (b) IL-4; (c) IL-5; (d) IL-6; (e) IL-7; (f) IL-12; (g) IL-13; (h) IL-18; (i) G-CSF; (j) GM-CSF; (k) GRO/KC; (l) IFN- $\lambda$ ; (m) MIP-1 $\alpha$ ; (n) VEGF. Normal control rats, Controls; parental mesothelioma cells, II-45; cisplatin resistant II-45 cells, CisR; pemetrexed resistant II-45 cells, PemR; combination (cisplatin + pemetrexed) resistant II-45 cells, ComboR; gemcitabine resistant II-45 cells, GemR; vinorelbine resistant II-45 cells, VLBR. P-values were calculated using a one-way Anova test with a value of less than 0.05 indicating significance. \* $p < 0.05$ , \*\* $p < 0.01$ , \*\*\* $p < 0.001$  relative to rats with parental II-45 mesothelioma.

## References

1. Foster MR, Johnson JE, Olson SJ, Allred DC, Immunohistochemical analysis of nuclear versus cytoplasmic staining of WT1 in malignant mesotheliomas and primary pulmonary adenocarcinomas. *Arch Pathol Lab Med*, **125** 1316-1320 (2001).
2. Husain AN *et al*, Guidelines for pathologic diagnosis of malignant mesothelioma: a consensus statement from the International Mesothelioma Interest Group. *Arch Pathol Lab Med*, **133** 1317-1331 (2009).
3. Ordonez NG, What are the current best immunohistochemical markers for the diagnosis of epithelioid mesothelioma? A review and update. *Hum Pathol*, **38** 1-16 (2007).
4. Klebe S, Nurminen M, Leigh J, Henderson DW, Diagnosis of epithelial mesothelioma using tree-based regression analysis and a minimal panel of antibodies. *Pathology*, **41** 140-148 (2009).
5. Scherpereel A *et al*, Guidelines of the European Respiratory Society and the European Society of Thoracic Surgeons for the management of malignant pleural mesothelioma. *Eur Respir J*, **35** 479-495 (2010).
6. Chirieac LR *et al*, The immunohistochemical characterization of sarcomatoid malignant mesothelioma of the pleura. *Am J Cancer Res*, **1** 14-24 (2011).
7. Kao SC *et al*, Validation of a minimal panel of antibodies for the diagnosis of malignant pleural mesothelioma. *Pathology*, **43** 313-317 (2011).
8. Padgett DM, Cathro HP, Wick MR, Mills SE, Podoplanin is a better immunohistochemical marker for sarcomatoid mesothelioma than calretinin. *Am J Surg Pathol*, **32** 123-127 (2008).
9. Yaziji H *et al*, Evaluation of 12 antibodies for distinguishing epithelioid mesothelioma from adenocarcinoma: identification of a three-antibody immunohistochemical panel with maximal sensitivity and specificity. *Mod Pathol*, **19** 514-523 (2006).
10. Lucas DR *et al*, Sarcomatoid mesothelioma and its histological mimics: a comparative immunohistochemical study. *Histopathology*, **42** 270-279 (2003).
11. Betta PG, Magnani C, Bensi T, Trincerri NF, Orecchia S, Immunohistochemistry and molecular diagnostics of pleural malignant mesothelioma. *Arch Pathol Lab Med*, **136** 253-261 (2012).
12. Klebe S *et al*, Sarcomatoid mesothelioma: a clinical-pathologic correlation of 326 cases. *Mod Pathol*, **23** 470-479 (2010).
13. Iwanami T *et al*, Clinical significance of epithelial-mesenchymal transition-associated markers in malignant pleural mesothelioma. *Oncology*, **86** 109-116 (2014).
14. Scholzen T, Gerdes J, The Ki-67 protein: from the known and the unknown. *J Cell Physiol*, **182** 311-322 (2000).
15. Comin CE, Novelli L, Boddi V, Paglierani M, Dini S, Calretinin, thrombomodulin, CEA, and CD15: a useful combination of immunohistochemical markers for differentiating pleural epithelial mesothelioma from peripheral pulmonary adenocarcinoma. *Hum Pathol*, **32** 529-536 (2001).

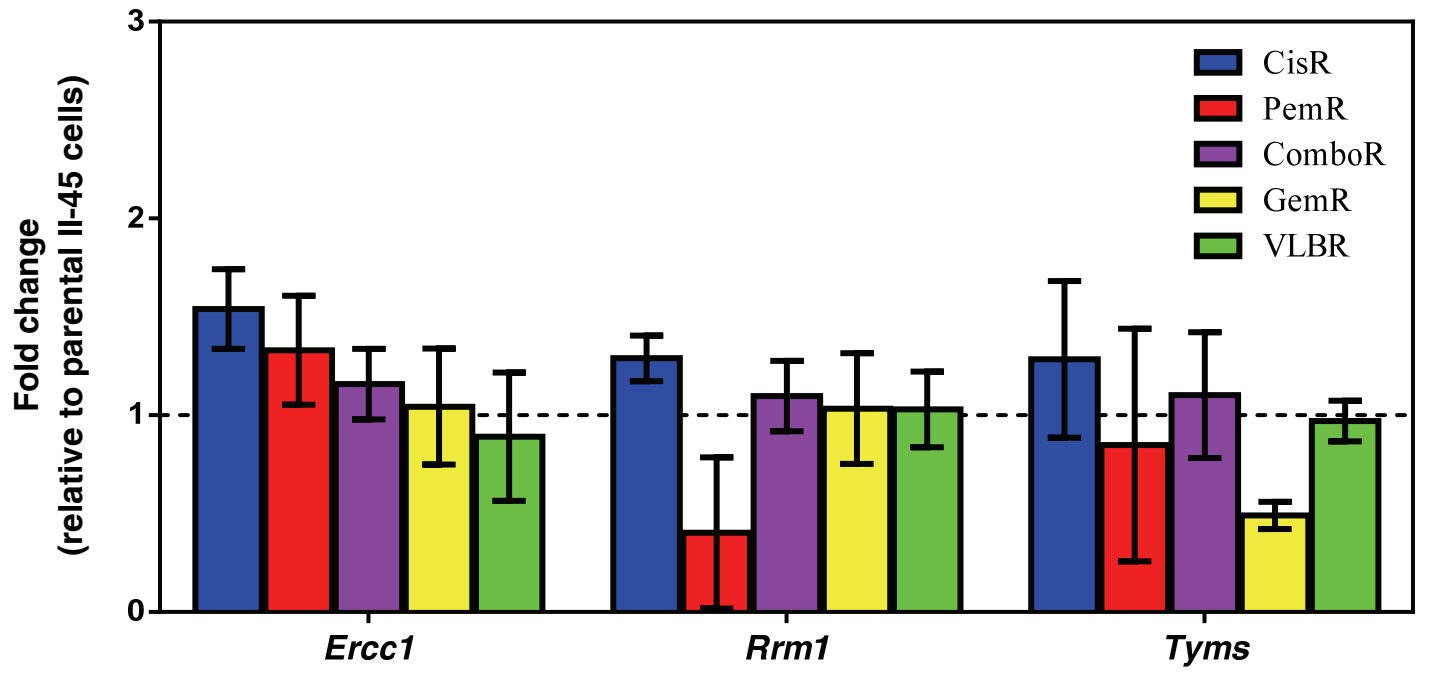



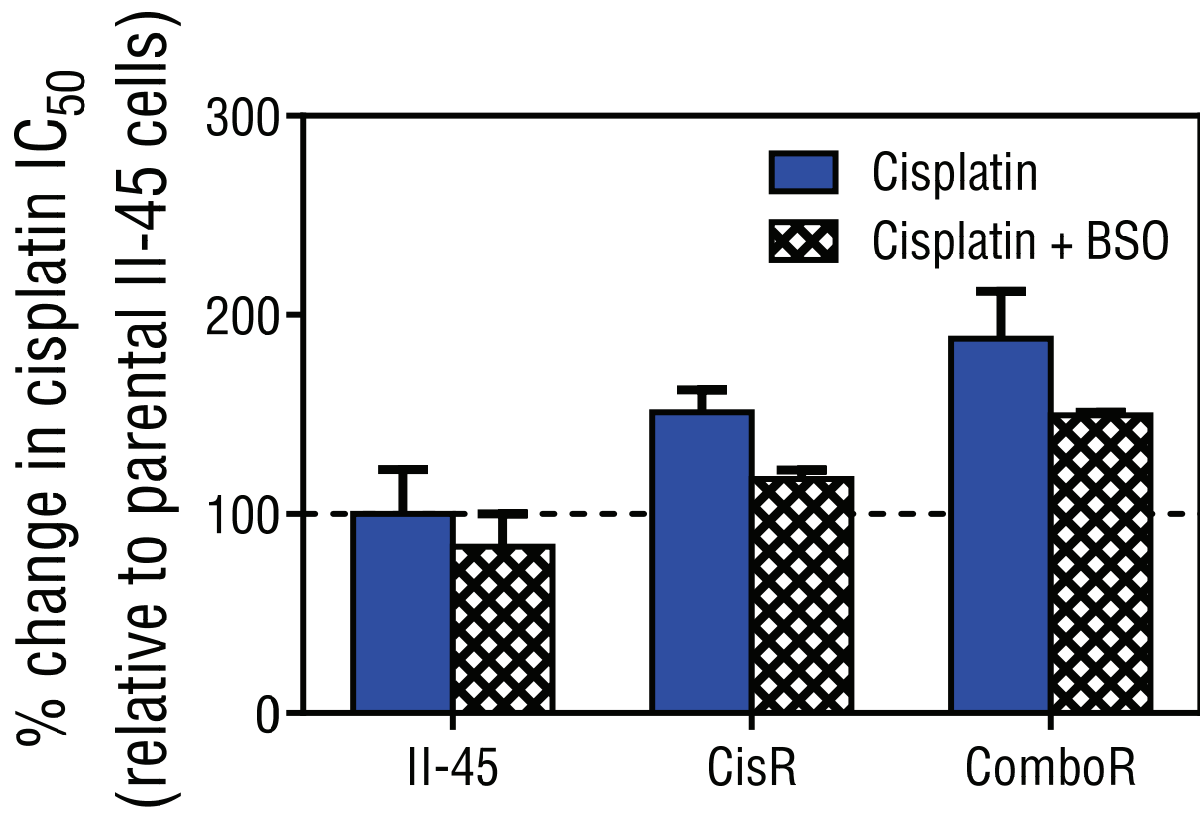

# Chromosome 5 Genomic alteration (Log2 Ratio)

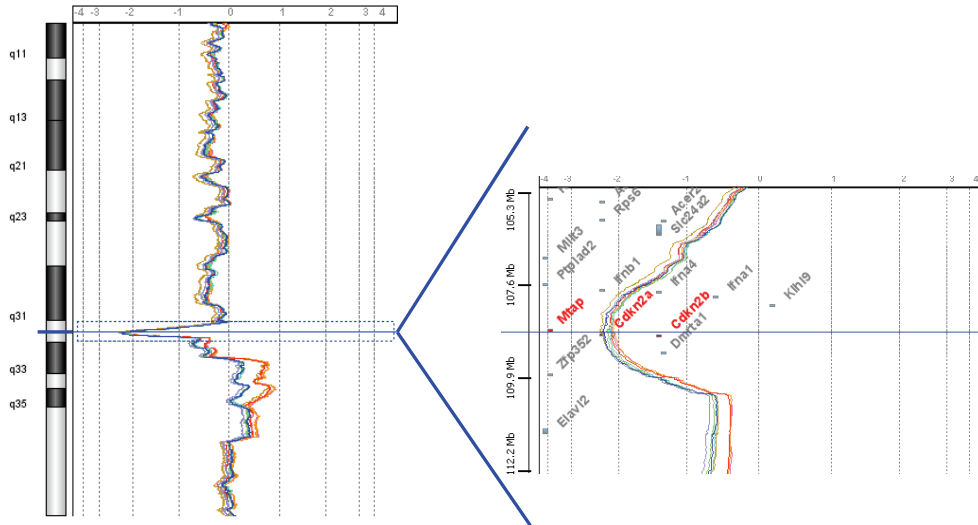

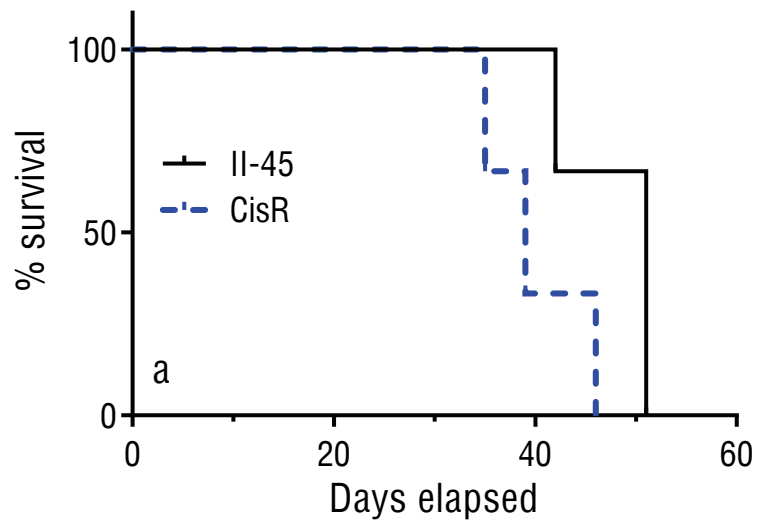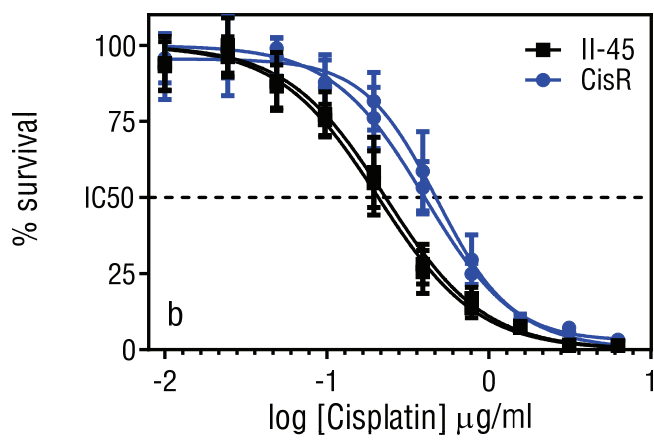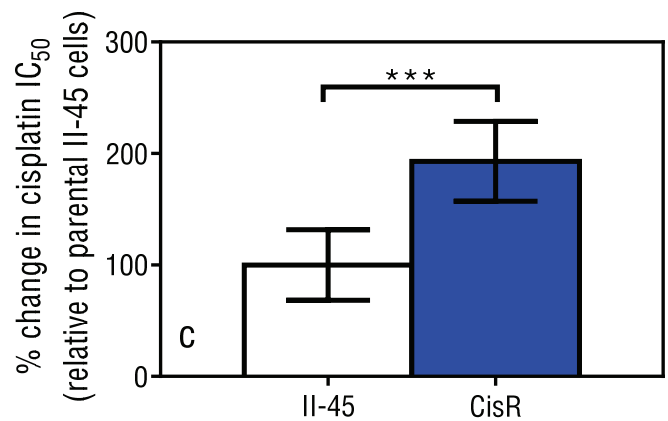

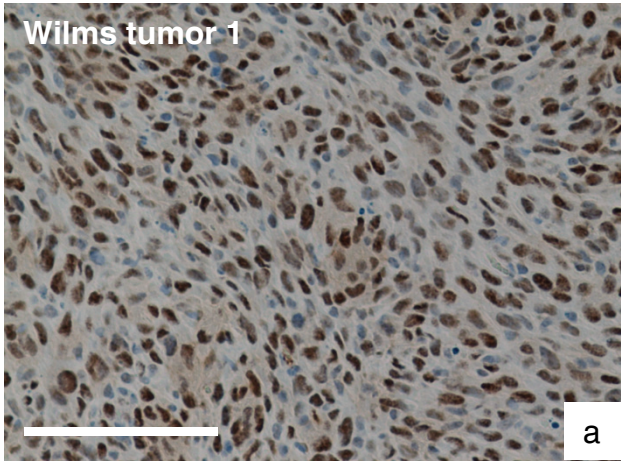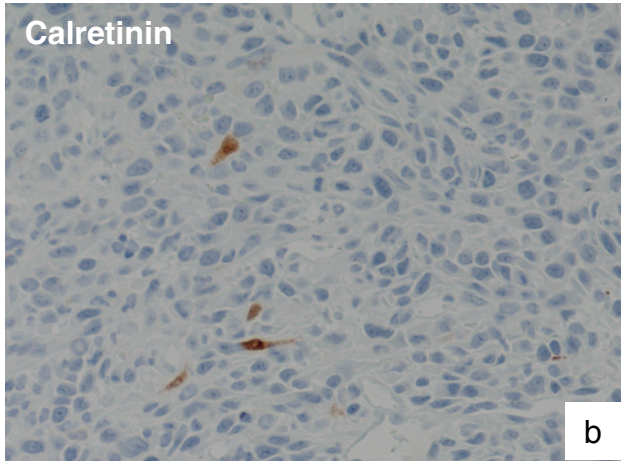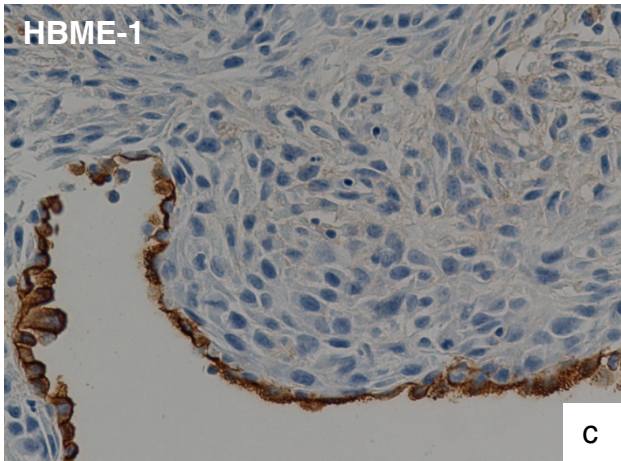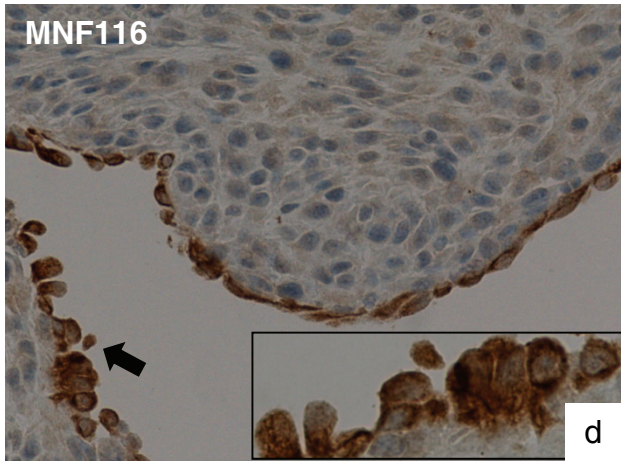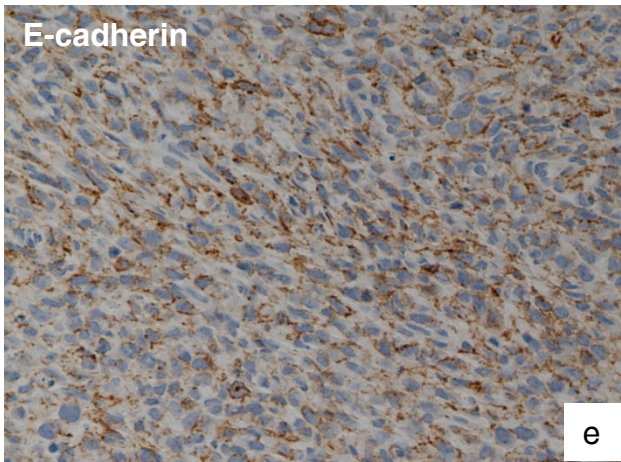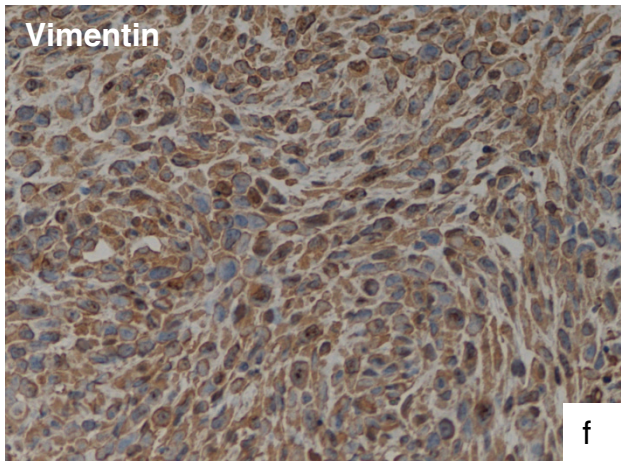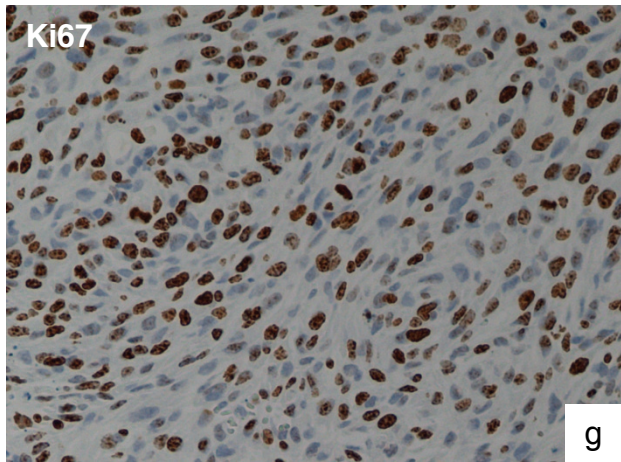

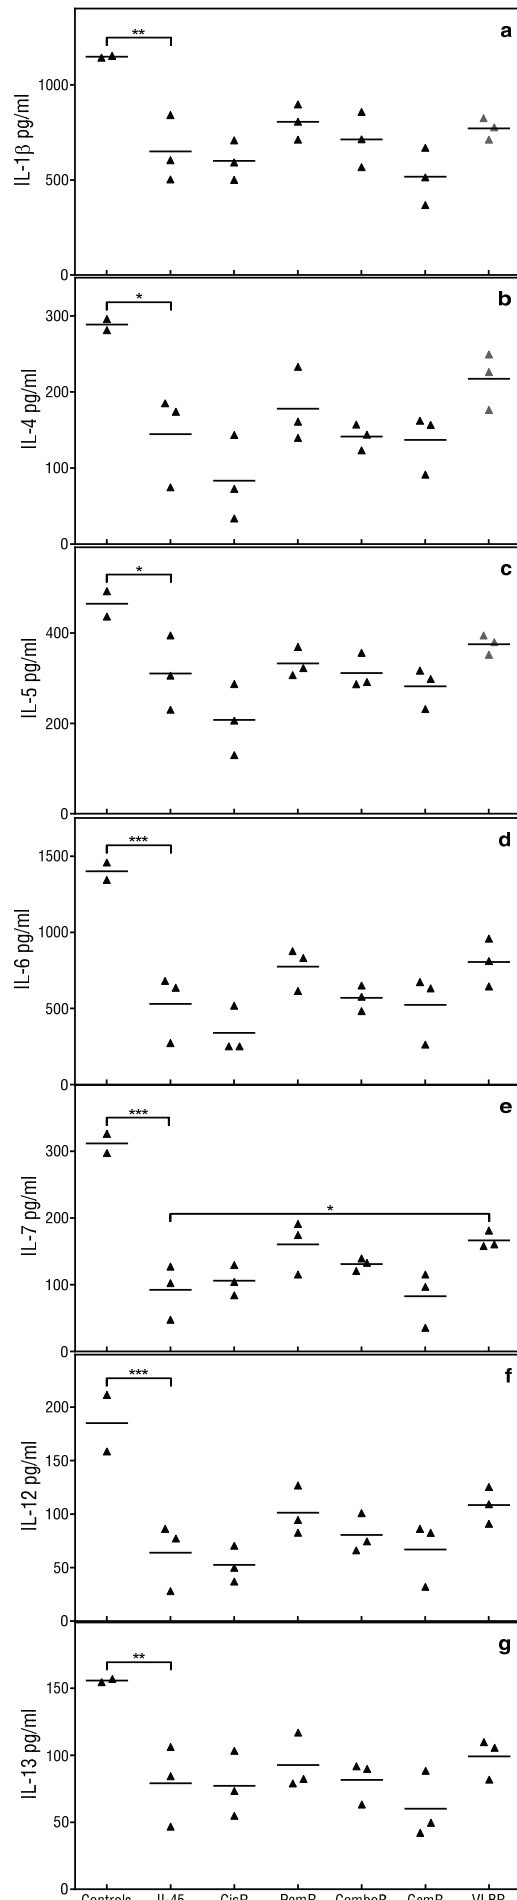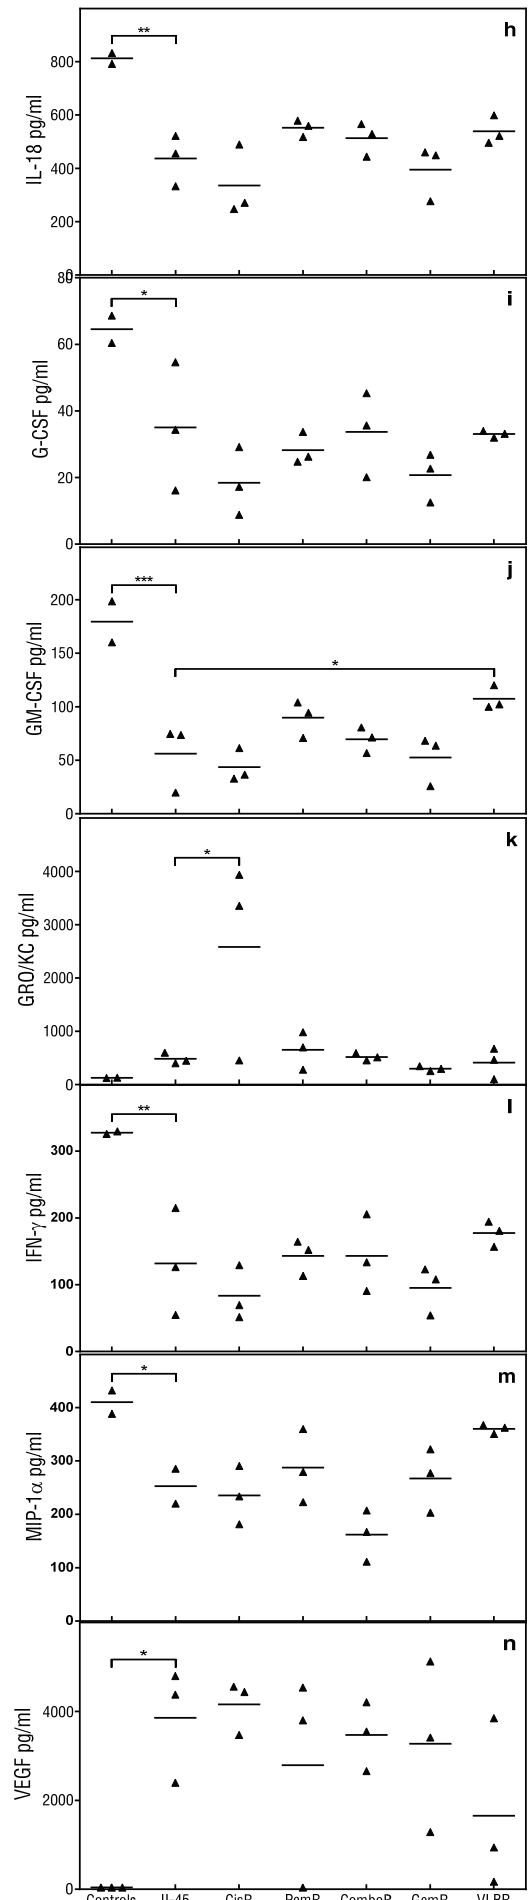

Supplement: srep06152-s1.pdf [file srep06152-s1.pdf]
